# Supplementary material
Source: publisher figshare collection journal article supplement (https://gsapubs.figshare.com/articles/dataset/_/22220728)
Supplement: Supplementary file 1 [file 1]

Klein, B.Z., and Eddy, M.P., 2023, What's in an age? Calculation and interpretation of ages and durations from U-Pb zircon geochronology of igneous rocks: GSA Bulletin, <https://doi.org/10.1130/B36686.1>.

## Supplemental Material

**Figure S1.** Calculated mean ages for analytical volumes of zircon as a function of the distance from zircon center (following page).

**Supplemental Data.** Matlab code required to recreate all figures in the text (Separate zip file).

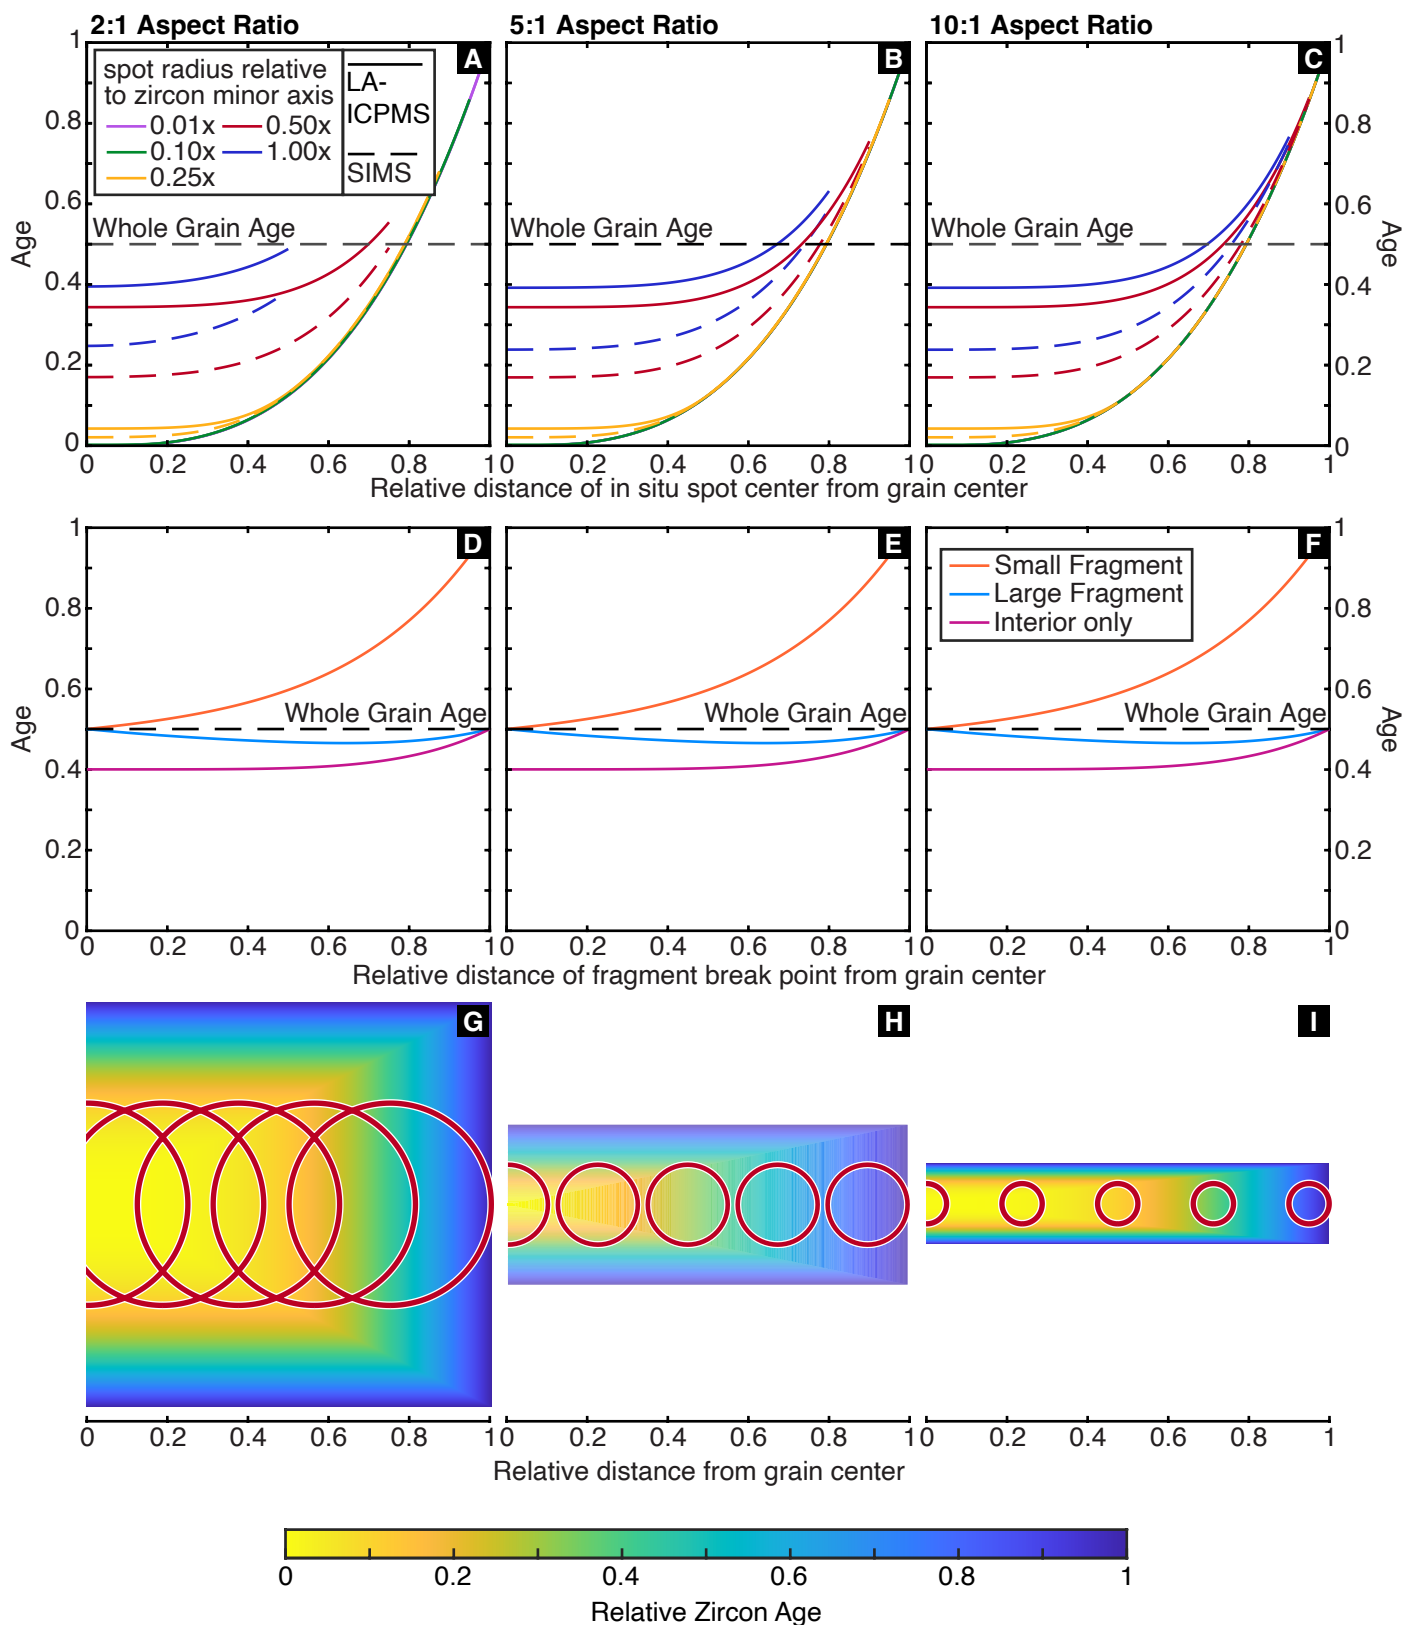

**Supplementary Figure 1:** Calculated mean ages for analytical volumes of zircon as a function of the distance from zircon center. Calculations are similar to Figure 2, but here uniform growth rates are used in all three columns, and the effect of varying zircon aspect ratios are evaluated (illustrated in G-I). Changing the aspect ratio has a modest impact on microbeam analytical techniques, with higher age resolution possible in higher aspect ratio grains (A-C). However, integrated zircon fragment ages are insensitive to changes in aspect ratio (D-F).
